# Supplementary material for: A facile preparation of ZnGa2O4photonic crystals with enhanced light absorption and photocatalytic activity
Source: Royal Society of Chemistry journal article supplement (doi:10.1039/c4ta03333g), 2014-01-01
Supplement: c4ta03333g1.pdf [file c4ta03333g1.pdf]

## **Electronic Supplementary Information**

### **Facile preparation of $\text{ZnGa}_2\text{O}_4$ photonic crystals with enhanced light absorption and photocatalytic activity**

Xiaofang Li, Xiaoyun Zhang, Xiuzhen Zheng, Yu Shao, Miao He, Peng Wang, Xianzhi Fu  
and Danzhen Li\*

Research Institute of Photocatalysis, State Key Laboratory of Photocatalysis on  
Energy and Environment, Fuzhou University, Fuzhou 350002, P. R. China

\* Corresponding author Tel & Fax: (+86)591-83779256, E-mail: [dzli@fzu.edu.cn](mailto:dzli@fzu.edu.cn)

Number of Pages: 11, Number of Figures: 8, Number of Table: 1.

## Experimental section

**Preparation of Polystyrene Spheres:** Monodisperse polystyrene spheres with various sphere sizes were synthesized using a typical emulsion polymerization according to the literature. Typically, 100 mL of ultrapure water ( $18 \text{ M}\Omega/\text{cm}^2$  @  $25^\circ\text{C}$ ) and a certain amount of styrene were added into a three-necked, round-bottomed flask (250 mL). The mixture was stirred at 500 rpm, while being heated to  $70^\circ\text{C}$  and purged with nitrogen gas with a flow rate of 100 mL/min. After the mixture was kept at  $70^\circ\text{C}$  for 20 min, 0.1 g of  $\text{K}_2\text{S}_2\text{O}_8$  was added and the reaction lasted for 12 h. The resulting polystyrene spheres were centrifuged at 8000 rpm to remove any large agglomerates in the bottom and then the remained polystyrene spheres were centrifuged at 12000 rpm to remove small spheres in the upper liquid. The obtained precipitates were redispersed in 100 mL of water to form a colloidal polystyrene spheres suspension until needed. In the present study, monodisperse polystyrene spheres with various sphere sizes were produced by changing the amount of styrene, keeping all other experimental conditions the same.

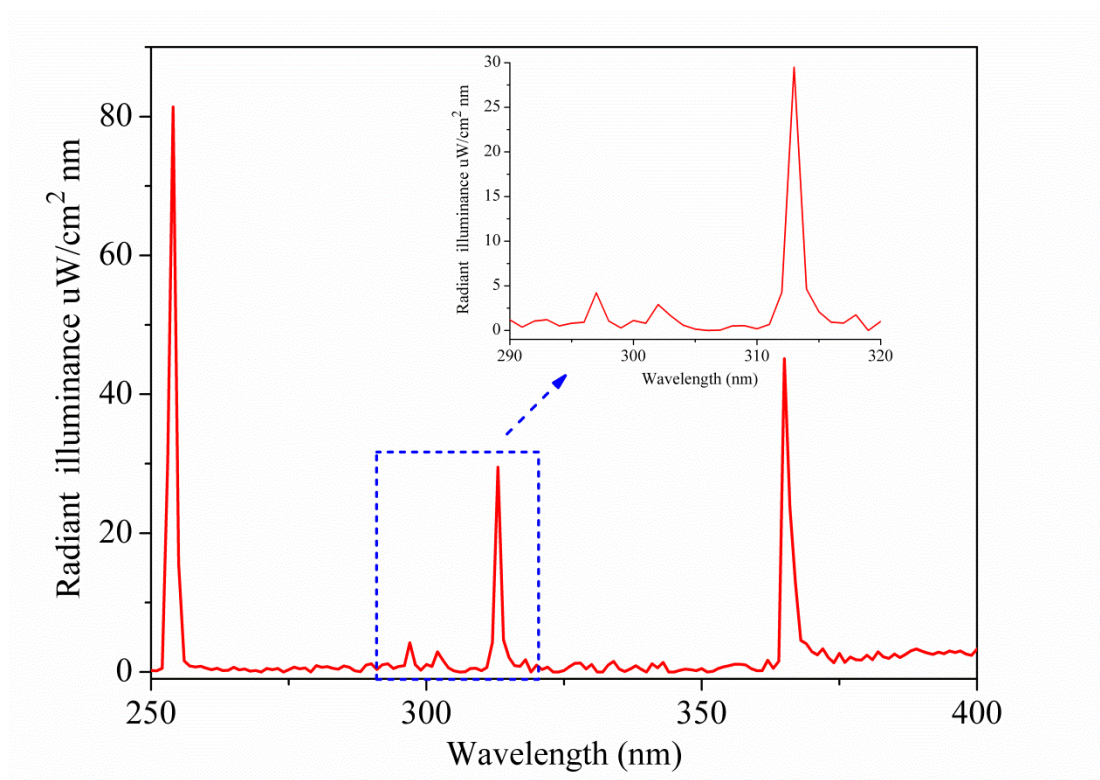

**Fig. S1** The spectrum of the UV light (center wavelength  $\lambda = 254 \text{ nm}$ ).

**Table 1** The UV band output of UV light (center wavelength  $\lambda = 254$  nm).

| Band / nm                    | UVC(220-280) | UVB(281-320) | UVA(321-390) |
|------------------------------|--------------|--------------|--------------|
| Output / $\text{cm}^{-2}$ uw | 137.9        | 77.9         | 169.5        |

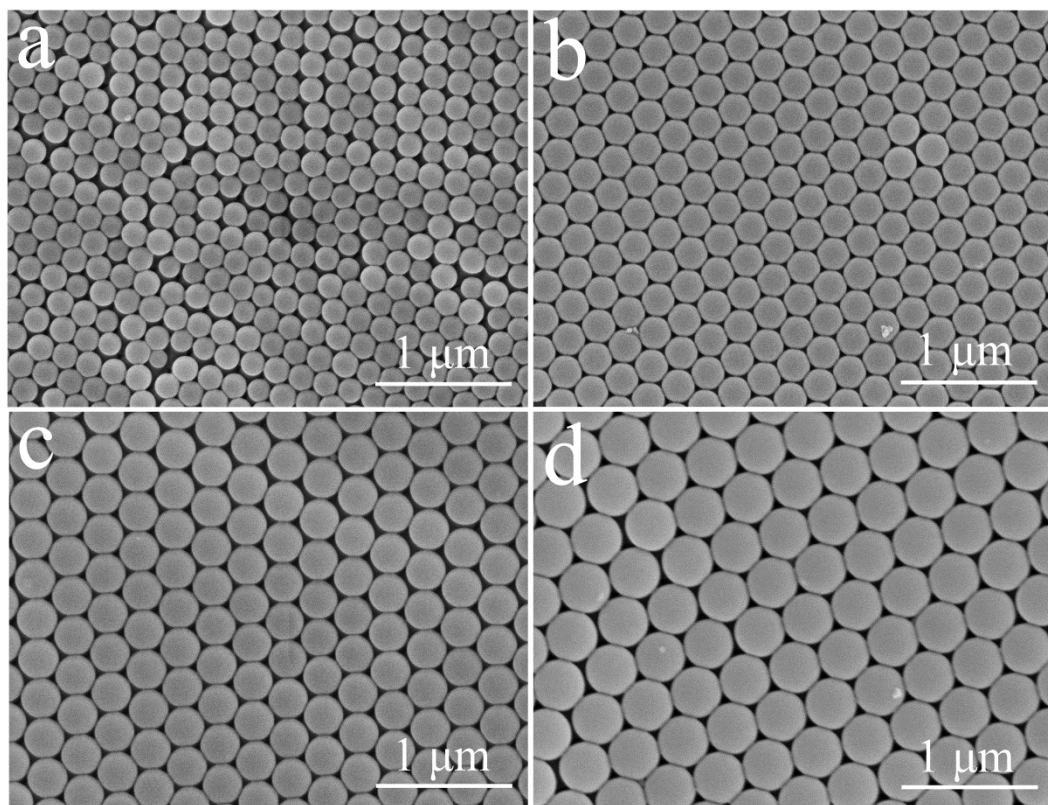

**Fig. S2** SEM images of the as-prepared PS sphere templates with different sphere diameters: (a) 190 nm, (b) 240 nm, (c) 300 nm, (d) 380 nm.

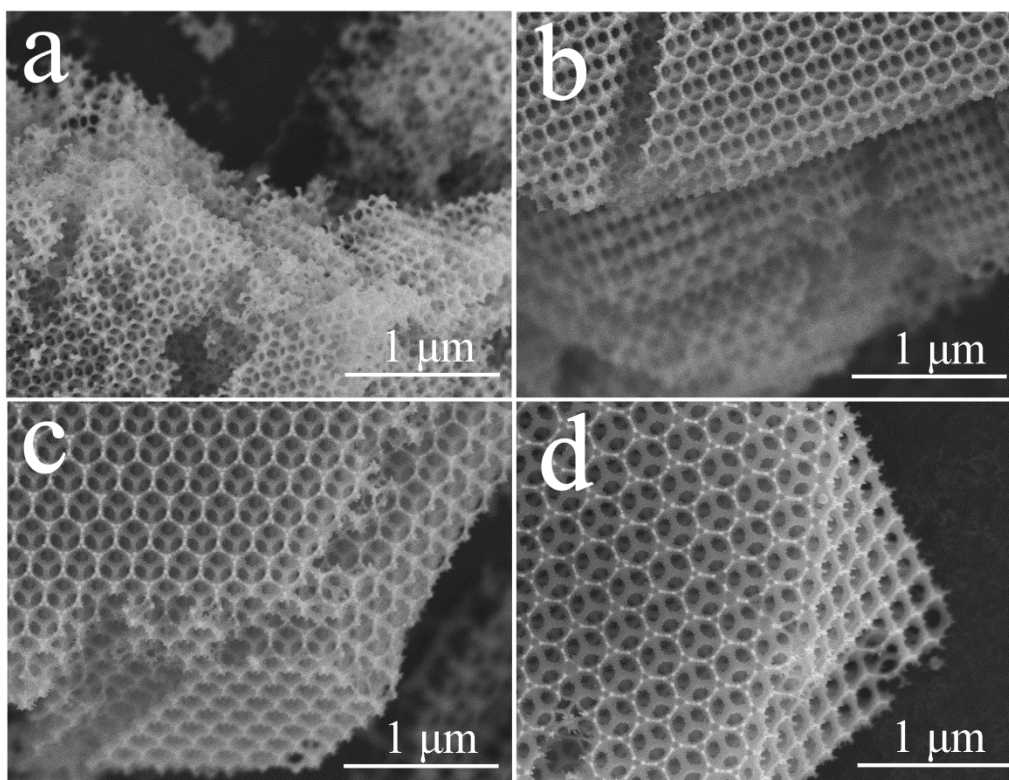

**Fig. S3** Cross-sectional SEM images of the  $\text{ZnGa}_2\text{O}_4$  PCs with different pore diameters prepared at 500 °C: (a) ZG PCs/145, (b) ZG PCs/180, (c) ZG PCs/225, and (d) ZG PCs/280.

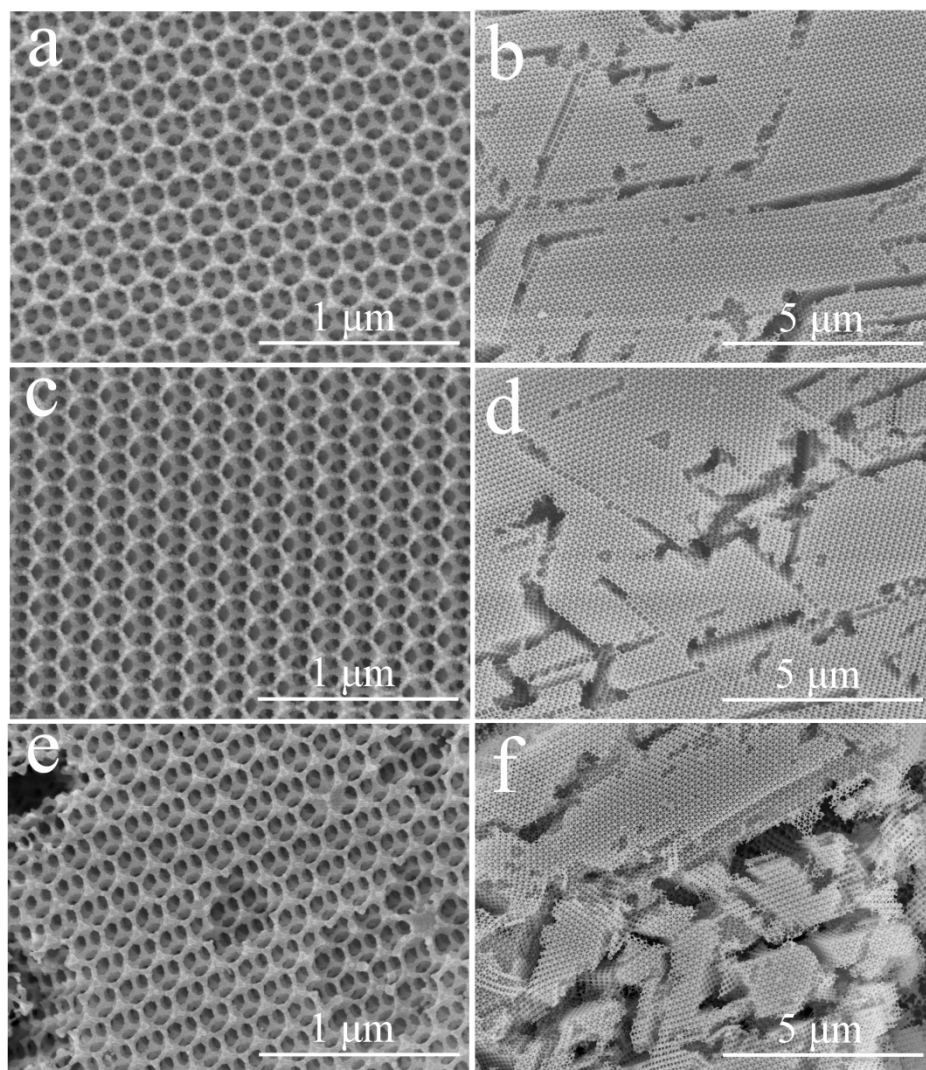

**Fig. S4** SEM images of the sample ZG PCs/180 prepared at different temperatures: (a, b) 400 °C, (c, d) 500 °C and (e, f) 600 °C.



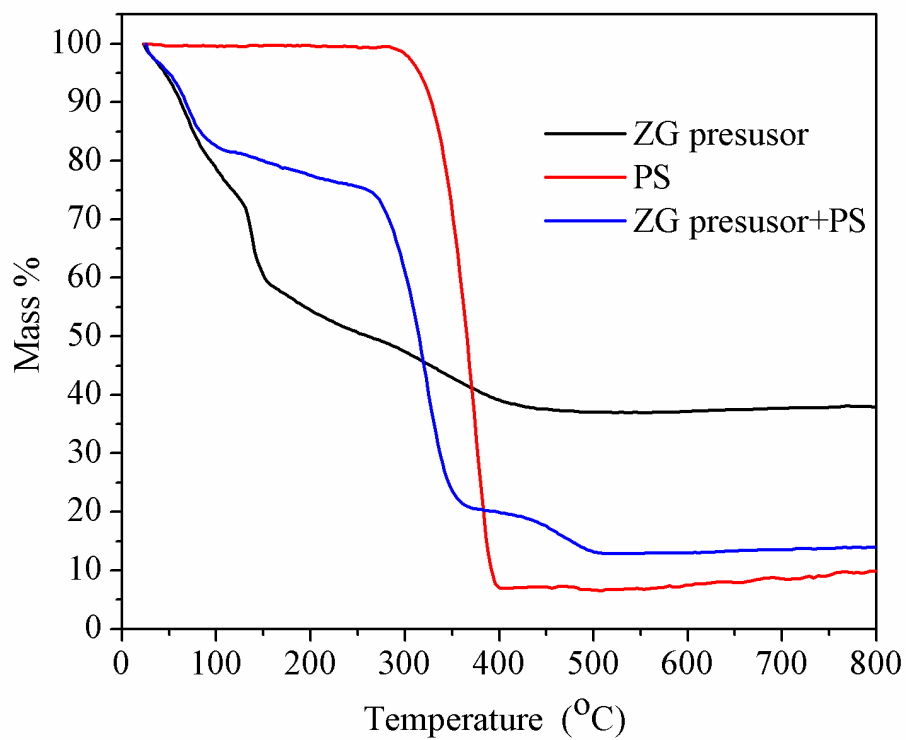

**Fig. S5** TG analysis of the amorphous complex precursor, the PS sphere template and the precursor infiltrated PS spheres template.



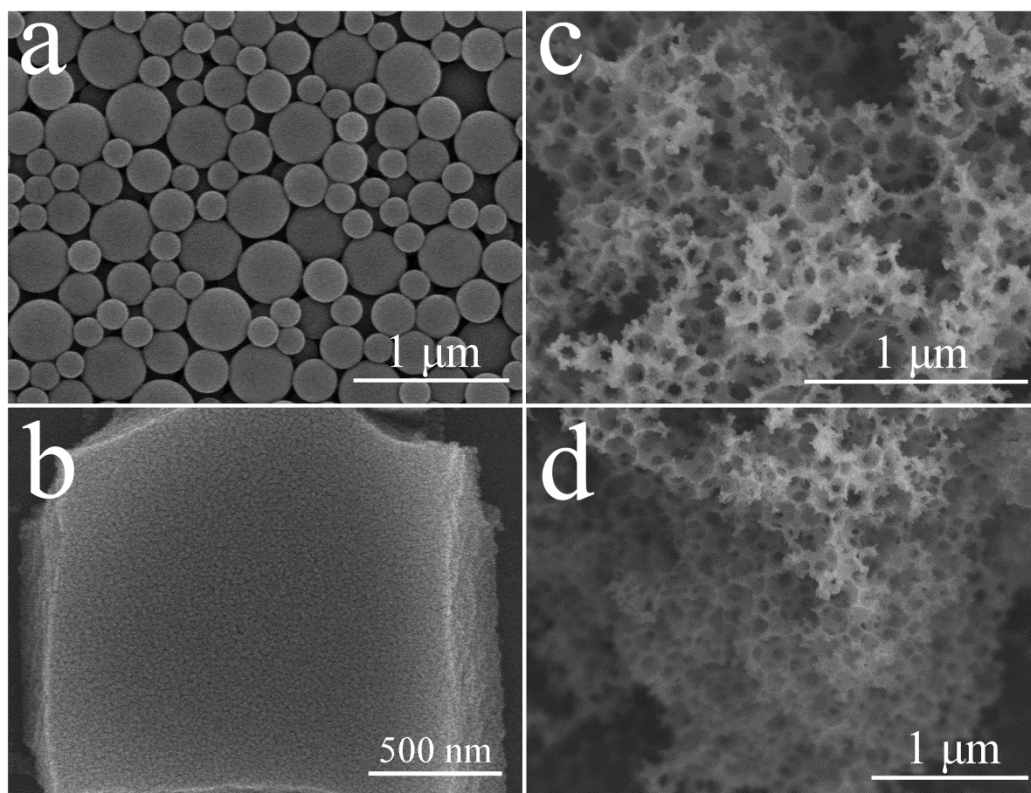

**Fig. S6** SEM images of (a) disordered PS sphere template, (b) sample ZG NCs and (c, d) sample ZG/mix.

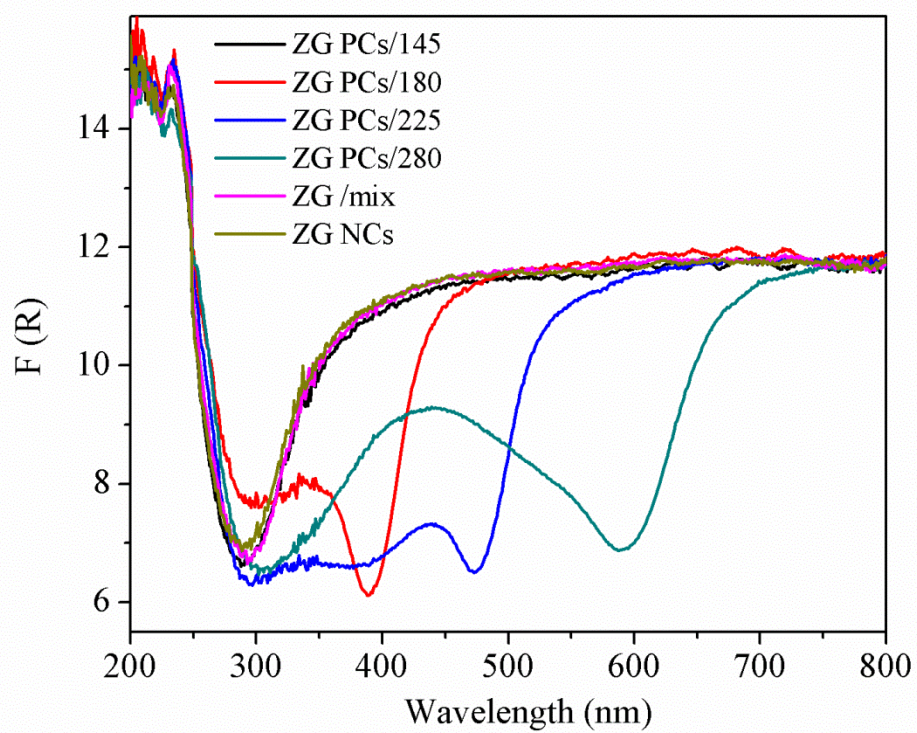

**Fig. S7** Absorption spectra of the as-prepared ZnGa<sub>2</sub>O<sub>4</sub> PCs

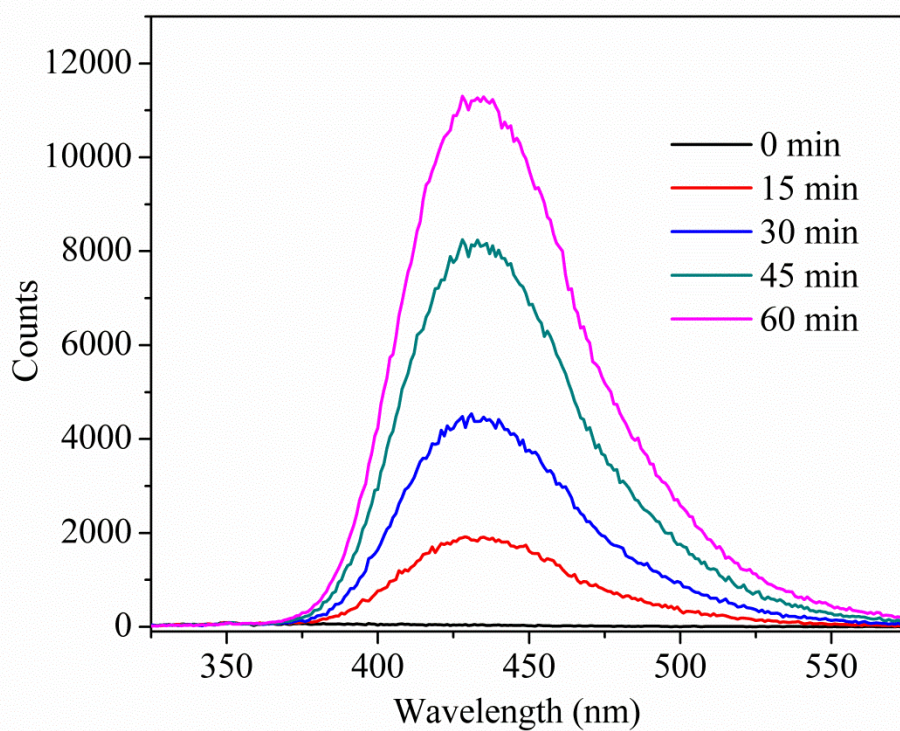

**Fig. S8** The  $\cdot\text{OH}$ -trapping PL spectra of the TA aqueous solution in the presence of sample ZG PCs/180.
